# Supplementary material for: Psychometric Validation of the Indonesian Version of Children’s Revised Impact of Event Scale 13
Source: MDPI journal article supplement (doi:10.3390/ijerph192417069), 2022-12-19
Supplement: s1 [file s1]

**Supplementary Table S1.** Content validity ratings for CRIES-13.

| Items                              | Expert 1 | Expert 2 | Expert 3 | Expert 4 | Expert 5 | Expert 6 | Experts in agreement | I-CVI | UA   |
|------------------------------------|----------|----------|----------|----------|----------|----------|----------------------|-------|------|
| 1                                  | 1        | 1        | 1        | 1        | 1        | 1        | 6                    | 1     | 1    |
| 2                                  | 1        | 1        | 1        | 1        | 1        | 1        | 6                    | 1     | 1    |
| 3                                  | 1        | 1        | 1        | 1        | 1        | 1        | 6                    | 1     | 1    |
| 4                                  | 1        | 1        | 1        | 1        | 1        | 1        | 6                    | 1     | 1    |
| 5                                  | 1        | 1        | 1        | 1        | 1        | 1        | 6                    | 1     | 1    |
| 6                                  | 1        | 1        | 1        | 1        | 1        | 1        | 6                    | 1     | 1    |
| 7                                  | 1        | 1        | 1        | 1        | 1        | 1        | 6                    | 1     | 1    |
| 8                                  | 1        | 1        | 1        | 1        | 1        | 1        | 6                    | 1     | 1    |
| 9                                  | 1        | 0        | 1        | 1        | 1        | 1        | 5                    | 0.83  | 0    |
| 10                                 | 1        | 1        | 1        | 1        | 1        | 1        | 6                    | 1     | 1    |
| 11                                 | 1        | 1        | 1        | 1        | 1        | 1        | 6                    | 1     | 1    |
| 12                                 | 1        | 1        | 1        | 1        | 1        | 1        | 6                    | 1     | 1    |
| 13                                 | 1        | 1        | 1        | 1        | 1        | 1        | 6                    | 1     | 1    |
| <b>S-CVI/Ave</b>                   |          |          |          |          |          |          |                      | 0.99  |      |
| <b>S-CVI/UA</b>                    |          |          |          |          |          |          |                      |       | 0.92 |
| <b>Proportional relevance</b>      | 1        | 0.92     | 1        | 1        | 1        | 1        |                      |       |      |
| <b>Average proportion of items</b> |          |          |          |          |          |          | 0.99                 |       |      |

Abbreviations: CRIES-13, Children's Revised Impact of Event Scale 13; I-CVI, item-level content validity index; S-CVI, scale-level content validity index; UA, universal agreement; S-CVI/Ave, scale-level content validity index based on averaging; S-CVI/UA, scale-level content validity index based on universal agreement.
